# Supplementary material for: Integrated Metabolomics and Transcriptomic Analysis of Hepatopancreas in Different Living Status Macrobrachium nipponense in Response to Hypoxia
Source: MDPI journal article supplement (doi:10.3390/antiox11010036), 2021-12-24
Supplement: s1 [file s1]

**Table S1.** Primers for qRT-PCR.

| Target mRNA                                      | Sequence (5'-3')        |
|--------------------------------------------------|-------------------------|
| Enolase -F                                       | TGATCTCACCAGTTCTAAGACCG |
| Enolase -R                                       | CGGTATCTGAAGCAATTCAAGCA |
| Hexokinase -F                                    | TGGAACAAATGCTTGCTACATGG |
| Hexokinase -R                                    | AGCTCTTCTTGAAACGCATTAC  |
| Triosephosphate Isomerase -F                     | CCCTTCCTGCTACCTGACTTATG |
| Triosephosphate Isomerase -R                     | CAAAAATGGTCCTCCTTTCTGGG |
| GTP Phosphoenolpyruvate Carboxykinase 1-F        | TAGTGTATTGGGGCAATGGTTCA |
| GTP Phosphoenolpyruvate Carboxykinase 1-R        | GACCAAAGGTACGACAGTTTGTG |
| GTP Phosphoenolpyruvate Carboxykinase 2-F        | TTAACATCATGCAGAAGGCTGGA |
| GTP Phosphoenolpyruvate Carboxykinase 2-R        | AGATCATCAGGTGACATCCACTT |
| L-Lactate Dehydrogenase -F                       | CTCGTTTCAGATTCCACTTGTCC |
| L-Lactate Dehydrogenase -R                       | TTGTGCATCTCGTTGTACTTGTG |
| GTP Phosphoenolpyruvate Carboxykinase 3-F        | GAGACACCAACTGGACTAAGGAG |
| GTP Phosphoenolpyruvate Carboxykinase 3-R        | CCGAAGTTGTAACCGAAGAATGG |
| GTP Phosphoenolpyruvate Carboxykinase 4-F        | AAGAACCTGGATAAACGTGTGGA |
| GTP Phosphoenolpyruvate Carboxykinase 4-R        | CCTATACATCAGGGTTGCAGTGA |
| Signal Transduction-Related Protein -F           | AAACGACAGATAAGCTACCGGAT |
| Signal Transduction-Related Protein -R           | ACATGGAACGTGAAGAGAAGTGA |
| Arginase -F                                      | GGAGCGAATAAAACGCTGGAAAT |
| Arginase -R                                      | GAAGCAATTATGTGTCGCTCGTT |
| Delta-1-Pyrroline-5-Carboxylate Synthase-Like -F | GAAGATGAAGAGACAGCAGACCA |
| Delta-1-Pyrroline-5-Carboxylate Synthase-Like -R | AAAATCAGACGCTACTCCACAGT |
| Wnt5-F                                           | TCATGTGAAAAGGGCTACAGACA |
| Wnt5-R                                           | GAAGGTGAAGTCTGCTCTTCTGA |

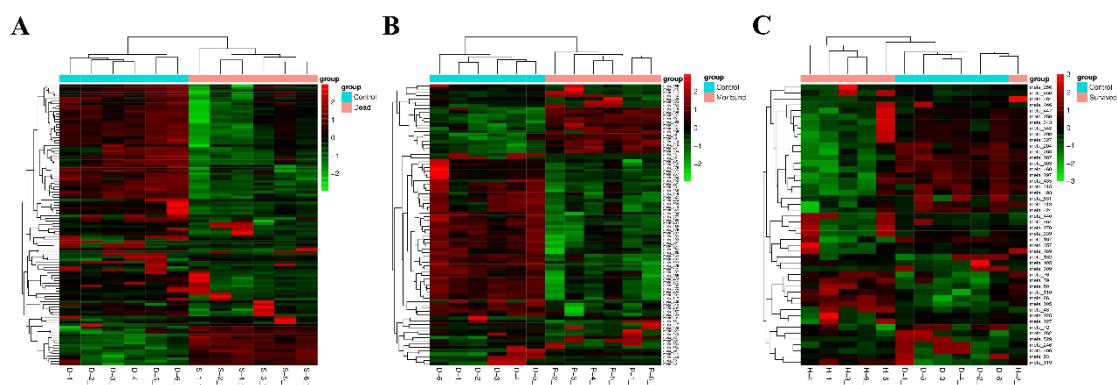

**Figure S1.** Cluster analysis of three comparisons between control and dead group (A), control and moribund group (B) and control and survived group (C).
